# Supplementary material for: Solution-based synthesis of SnO2 nanoparticle/CdS nanowire heterostructures
Source: Royal Society of Chemistry journal article supplement (doi:10.1039/c1ce05226h), 2011-01-01
Supplement: c1ce05226h.pdf [file c1ce05226h.pdf]

## Solution-Based Synthesis of SnO<sub>2</sub> Nanoparticle/CdS nanowire Heterostructure

Shancheng Yan<sup>1,2</sup>, Dong Hu<sup>1</sup>, Feihu Hu<sup>2</sup>, Jiansheng Wu<sup>1</sup>, Ningping Huang<sup>2</sup>, Zhongdang Xiao<sup>2\*</sup>

1. School of Geography and Biological Information, Nanjing University of Posts and  
Telecommunications, Nanjing 210046, P. R. China

2. State Key Laboratory of Bioelectronics (Chien-Shiung Wu Lab), School of  
Biological Science & Medical Engineering, Southeast University, Si Pai Lou 2#,  
Nanjing 210096, P. R. China

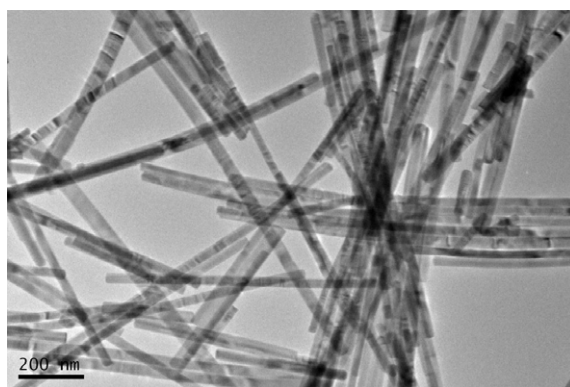

Figure S1 shows the image of pure CdS nanowire

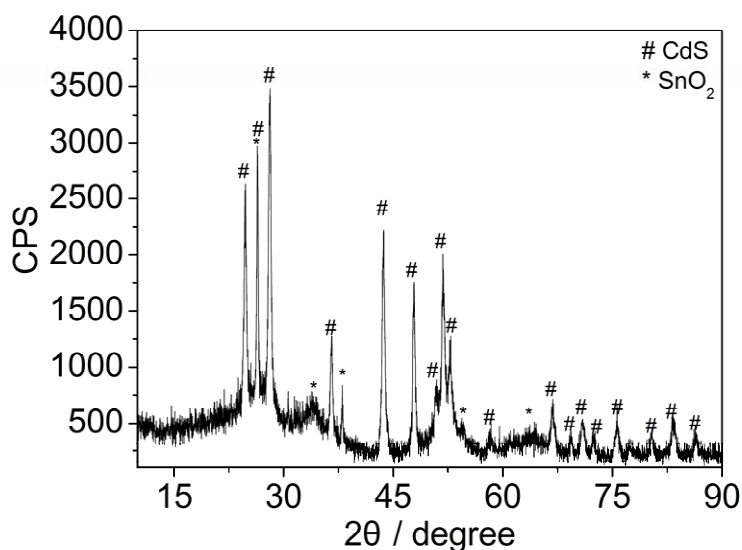

Figure S2 shows the XRD pattern of SnO<sub>2</sub> Nanoparticle/CdS nanowire.

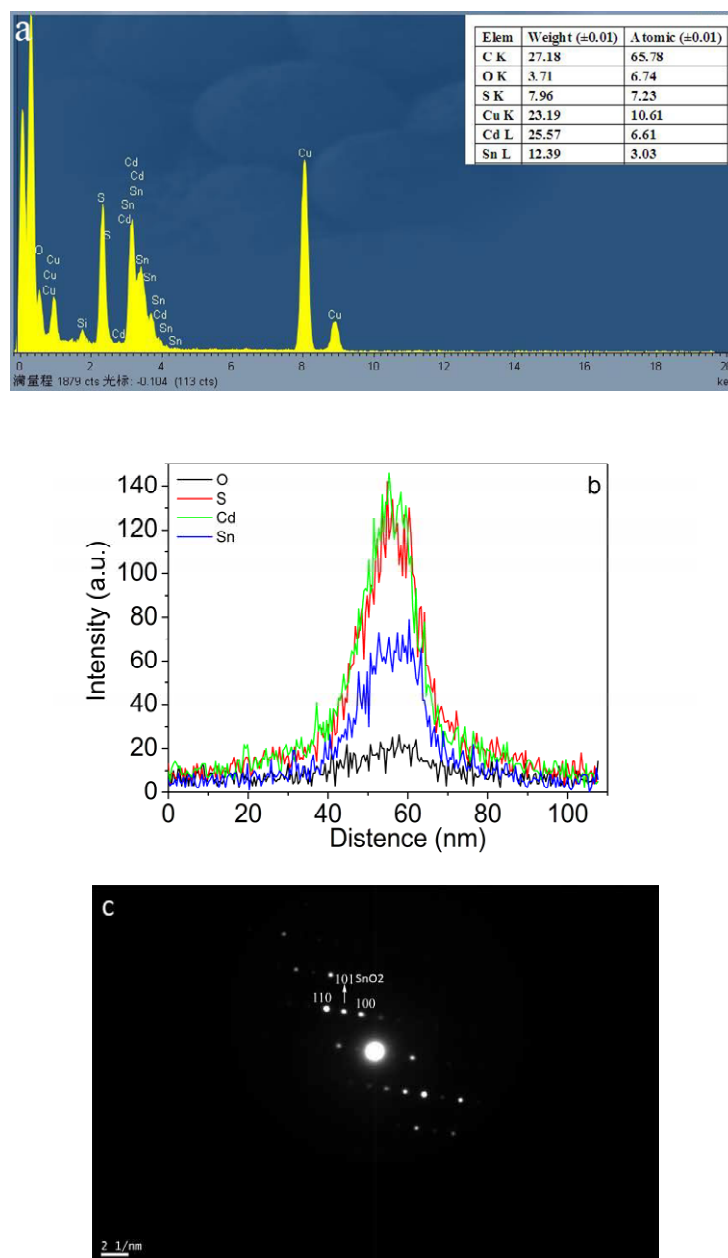

Figure S3a shows the EDXA analysis of SnO<sub>2</sub> Nanoparticle/CdS nanowire. In the EDXA spectrum, the peaks of Cd, S, Sn, and O are pronounced and no other peaks are found except for those of Cu and C originating from the Cu micro-grid with amorphous carbon used to support the SnO<sub>2</sub> Nanoparticle/CdS nanowire. The molar ratio of oxygen and tin was close to 2, calculated by EDXA software, indicated that the nanoparticle was SnO<sub>2</sub>. In order to further confirm the element of the product, the

corresponding EDX line scanning of single SnO<sub>2</sub> Nanoparticle/CdS nanowire was shown in the Figure S3b. It is noticeable that the ratio of O and Sn is about 2, with a uniform distribution of the elements along the cross-section in the Figure S3b. The SAED pattern of SnO<sub>2</sub> NP/CdS NW heterostructure is shown in the Figure S3c. From the SAED pattern, there are the crystal SnO<sub>2</sub> spots in the pattern, which is different from the pattern of single crystal CdS.

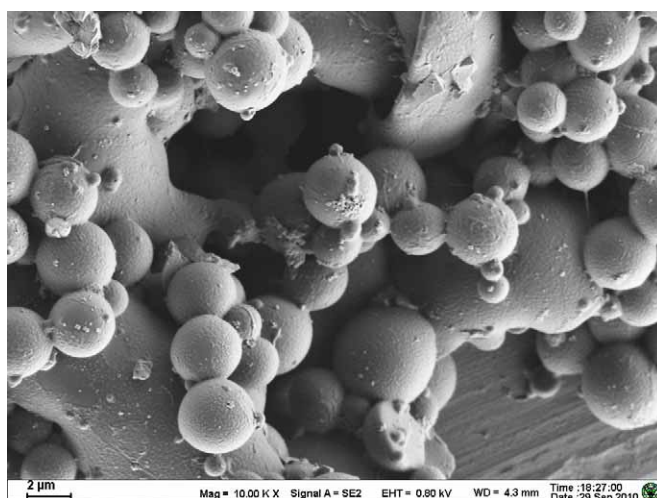

Figure S4 In contrast with SnO<sub>2</sub> NP/ CdS NW heterojunction reaction, a separate experiment (0.0075 g SnCl<sub>4</sub> · 5H<sub>2</sub>O were dissolved in 40 ml anhydrous ethanol. The resulting mixture was loaded into a 50 ml-Teflon-lined autoclave. The autoclave was sealed and maintained at 200°C for 24 h. The autoclave was cooled to room temperature naturally.) was carried out for SnO<sub>2</sub> materials. The products are purely SnO<sub>2</sub> microparticles (Figure S4). The typical FESEM image is illustrated in Figure S4.

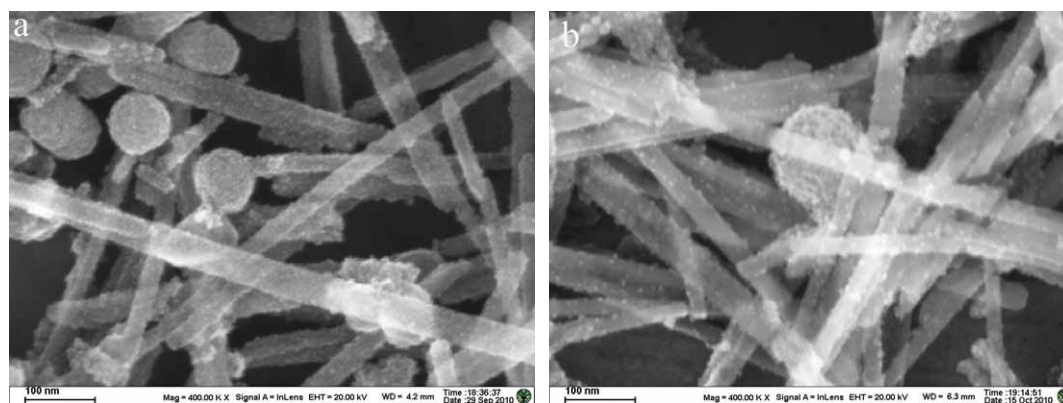

Figure S5 The product was firstly fabricated by the chemical solution method. 0.0030 g as-prepared CdS and 0.0075 g  $\text{SnCl}_4 \cdot 5\text{H}_2\text{O}$  were dissolved in 40 ml anhydrous ethanol. The resulting mixture was loaded into a 50 ml-Teflon-lined autoclave. The autoclave was sealed and maintained at  $200^\circ\text{C}$  for 24 h. The autoclave was cooled to room temperature naturally. Subsequently, the 0.0075 g  $\text{SnCl}_4 \cdot 5\text{H}_2\text{O}$  was added into above autoclave again. (a)The autoclave was sealed again and maintained at  $200^\circ\text{C}$  for 24 h (total 48h). (b) The autoclave was cooled to room temperature naturally; the autoclave was sealed again and maintained at  $200^\circ\text{C}$  for 48 h (total 72h). According to Figure S5a, it was found that the product was  $\text{SnO}_2$  NP/CdS NW heterostructures when the autoclave was sealed again and maintained at  $200^\circ\text{C}$  for 24h (total 48h). To further extend the reaction time, like 48h, an interesting phenomenon appeared. Figure S5b shows there are few  $\text{SnO}_2$  nanoparticles on the surface of CdS nanowires when the autoclave was sealed again and maintained at  $200^\circ\text{C}$  for 48h (total 72h) though the amount of the  $\text{SnCl}_4 \cdot 5\text{H}_2\text{O}$  was twice than previous experiment.
